# Supplementary material
Source: PubMed Central journal article supplement (PMC2752562)
Supplement: 0904519106_0904519106SI.pdf [file 0904519106_0904519106SI.pdf]

# Supporting Information

Chen et al. 10.1073/pnas.0904519106

## SI Materials and Methods

**Confocal Microscopy.** Anti-FLAG (Sigma) and anti-Mito (ImmunoVision) antibodies were used for immunofluorescence assay. Cells were visualized by using Nikon confocal instruments.

**Construction of Mfrn Chimeras.** Mfrn chimeras Ch1 and Ch2 were constructed by using overlapping PCR. Chimera 1 consists of the first 50 amino acid residues of Mfrn1 and amino acid residues 51–364 of Mfrn2. Chimera 2 consists of the first 25 amino acid residues of Mfrn1 and amino acid residues 26–364 of Mfrn2.

**cRNA Microinjections and Genotyping.** We subcloned BT-Mfrn1 and Mfrn chimera cDNA clones into the pCS2+ vector and prepared 5'-capped cRNA by using the SP6 mMessage mMachine kit (Ambion) for expression in zebrafish. Fertilized eggs from *frascati* (*frs<sup>tg223</sup>*) heterozygous pairs were injected at the one- to two-cell stage with roughly 100 pg of cRNA and phenol red dye as a tracer. Genotyping of all zebrafish embryos participating in the microinjection studies was performed with allele-specific oligonucleotides (1) as described previously (2).

1. Farr CJ, et al. (1988) Analysis of RAS gene mutations in acute myeloid leukemia by polymerase chain reaction and oligonucleotide probes. *Proc Natl Acad Sci USA* 85:1629–1633.

2. Shaw GC, et al. (2006) Mitoferrin is essential for erythroid iron assimilation. *Nature* 440:96–100.

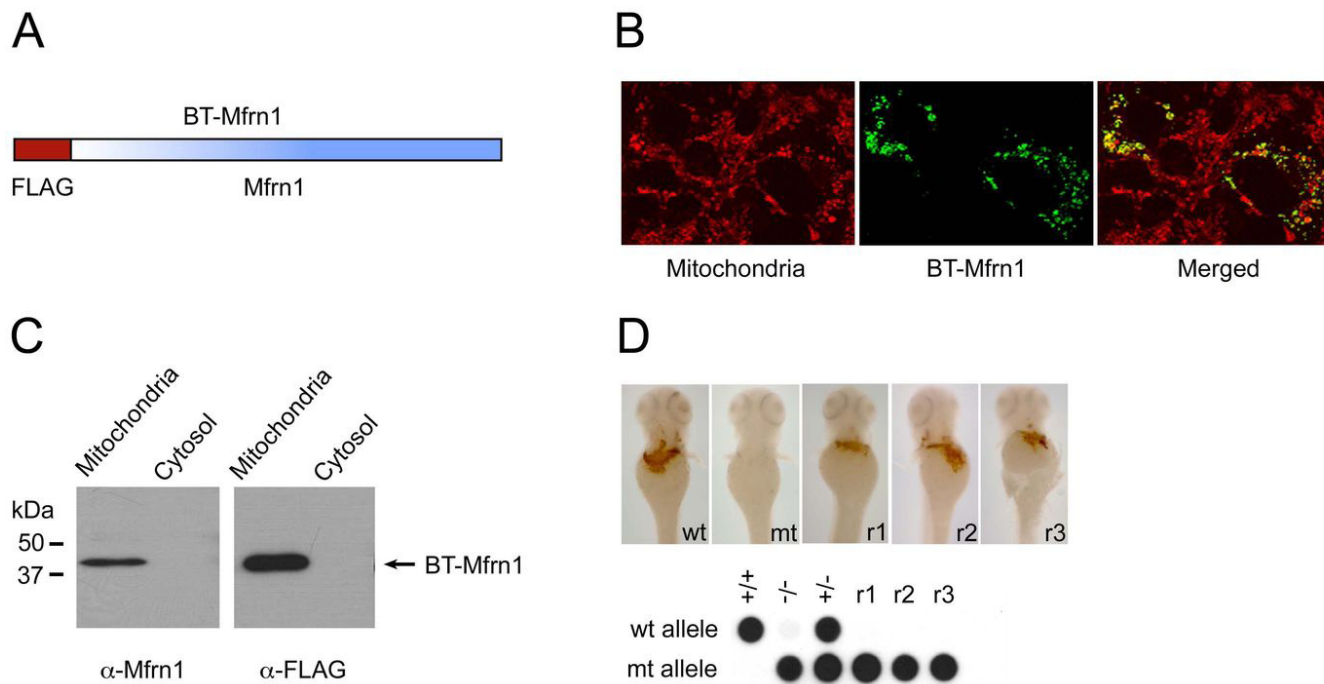

**Fig. S1.** BT-Mfrn1 properly targets to the mitochondrial compartment and complements anemia of *frs* mutants, and so it is validated as a functional bait for affinity purification. (A) Mouse Mfrn1 was FLAG-tagged at its N terminus as bait for affinity purification. The FLAG-tagged construct was referred as BT-Mfrn1. (B) Immunolocalization of BT-Mfrn1 protein to mitochondria of transfected COS7 cells. Fluorescence confocal images were obtained from immunostained resident mitochondrial proteins (red) and BT-Mfrn1 (green). Colocalized expression of BT-Mfrn1 in the mitochondria is indicated by the yellow signal. (C) BT-Mfrn1 proteins properly targeted to the mitochondrial fraction. Mitochondrial and cytosolic fractions were isolated from BT-Mfrn1-transfected COS7 cells and immunoblotted by anti-Mfrn1 and anti-FLAG antibodies, respectively. (D) Expression of BT-Mfrn1 cRNA rescued the anemia of *frascati* (*frs*<sup>q223</sup>) embryos. Control wild-type (wt), *frs* mutant (mt), and rescued *frs* embryos (r1–3) were stained with  $\alpha$ -dianisidine to detect hemoglobinized cells. Control wild-type, mutant, heterozygote, and rescued *frs* (r1–3) embryos were genotyped. Genotyping results in the *Right Lower* confirmed that these three putative rescued embryos (r1–3) are mutants.

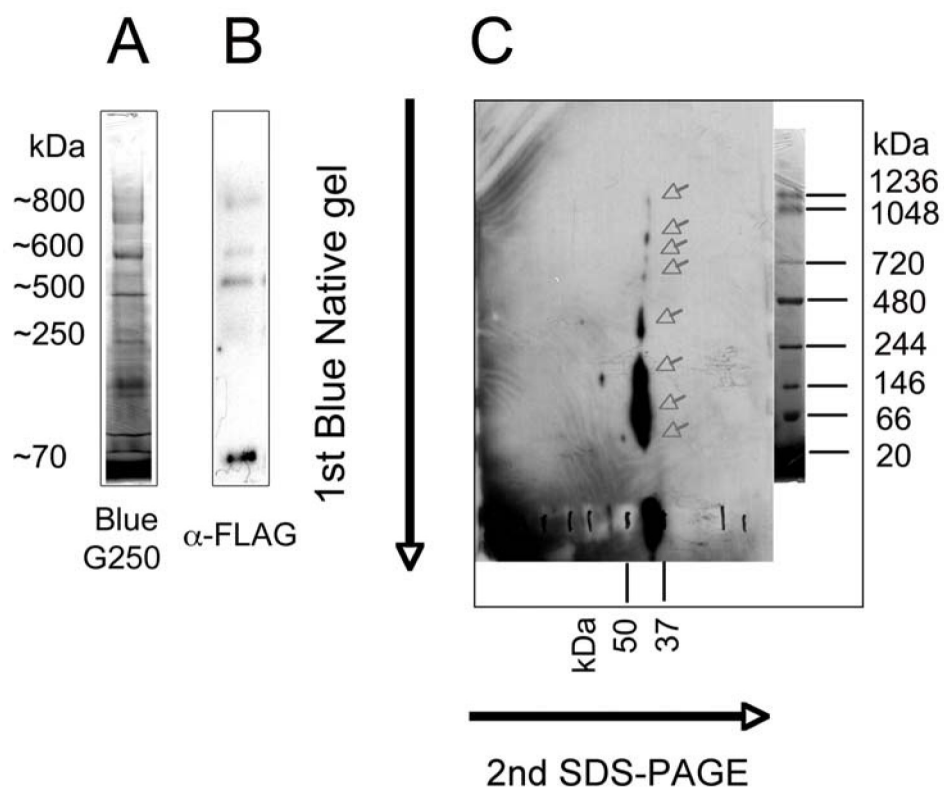

**Fig. S2.** BT-Mfrn1 forms higher-order oligomeric complexes with other mitochondrial proteins. (A) Mitochondria were solubilized with 1% Nonidet P-40 and subjected to separation on a neutral-pH, nondenaturing Blue Native gel with Coomassie G250 dye. (B) Western blot analysis with anti-FLAG antisera shows at least four higher-order complexes. (C) When the entire lane from Blue Native gel (lane A) was subjected to a second-dimensional separation in an SDS/PAGE, followed by Western blot analysis, additional protein complexes containing BT-Mfrn1 were uncovered (arrows). Monomeric and homodimeric BT-Mfrn1 are the most abundant (lowest 2 arrows).

A

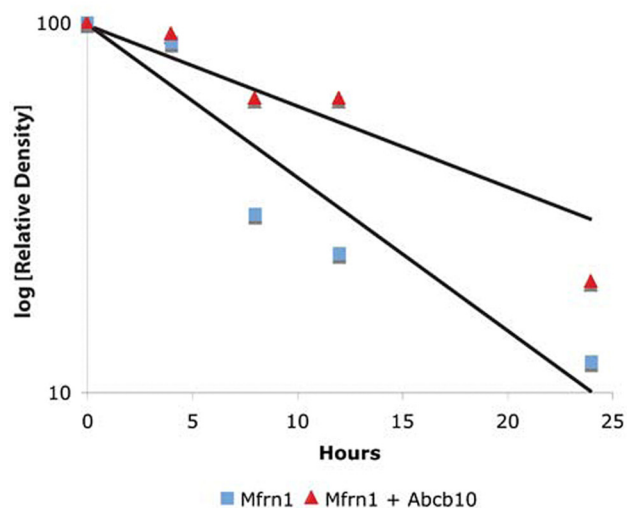

**B**

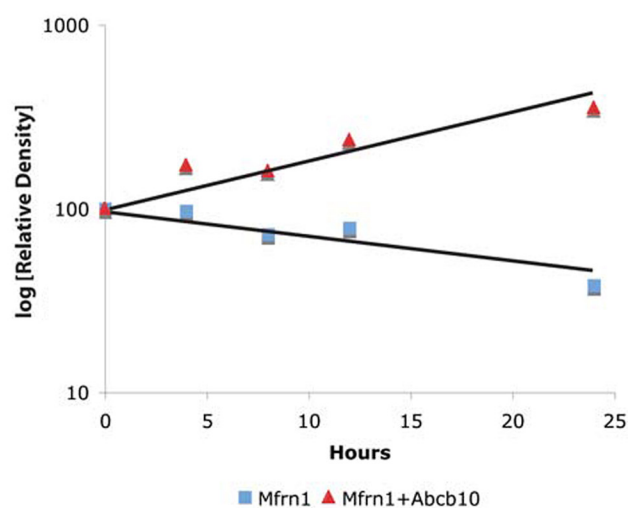

**Fig. S3.** Quantitation of pulse-chase assay and steady-state Western blot analysis of Mfrn1 stability. (A) Quantitation figure for Fig. 2A pulse-chase assay of Mfrn1. (B) Quantitation figure for Fig. 2B Western blot analysis of steady-state Mfrn1 proteins after normalization to the signal of the control protein Hsp60. The quantifications of the autoradiographic bands using Quantity One software (Bio-Rad) are plotted as the relative density compared with that at time 0 h. Both figures show Abcb10 stabilizes Mfrn1 protein half-life.

**Table S1. Abcb10 was identified as an interacting protein of Mfrn1 by affinity purification and MS**

| Protein name | No. of peptides identified |              |              | Total |
|--------------|----------------------------|--------------|--------------|-------|
|              | Experiment 1               | Experiment 2 | Experiment 3 |       |
| Mfrn1        | 24                         | 24           | 19           | 67    |
| Abcb10       | 7                          | 8            | 9            | 24    |
| Aralar1      | 11                         | 10           | 7            | 28    |
| OGCP         | 6                          | 2            | 2            | 10    |

Mfrn1 affinity-purified samples were analyzed by MS in triplicate analyses. Abcb10 protein was consistently identified as a Mfrn1-interacting protein with the coverage of 24 total peptides. No peptide of Abcb10 protein was recovered in three control samples.
